# Supplementary material for: Identification and characterization of a marine bacterium extract from Mameliella sp. M20D2D8 with antiviral effects against influenza A and B viruses
Source: Springer Nature journal article supplement (doi:10.1007/s00705-024-05979-8), 2024-02-07
Supplement: MOESM1 [file 705_2024_5979_MOESM1_ESM.pdf]

Supplementary Materials for

**Identification and characterization of a marine bacterium extract from *Mameliella* sp.  
M20D2D8 with antiviral effects against influenza A and B viruses**

Hyo-Jin Kim<sup>1\*</sup>, Jun-Gyu Park<sup>2\*</sup>, Kyeong-Seo Moon<sup>3</sup>, Su-Bin Jung<sup>3</sup>, Yong Min Kwon<sup>4</sup>, Nam Seon Kang<sup>4</sup>, Jeong-Hyeon Kim<sup>5</sup>, Sang-Jip Nam<sup>5</sup>, Grace Choi<sup>4†</sup>, Yeong-Bin Baek<sup>1†</sup>, Sang-Ik Park<sup>3†</sup>

<sup>1</sup>Laboratory of Veterinary Pathology, College of Veterinary Medicine, Chonnam National University, Gwangju 61186, Republic of Korea

<sup>2</sup>Laboratory of Veterinary Zoonotic Diseases, College of Veterinary Medicine, Chonnam National University, Gwangju 61186, Republic of Korea

<sup>3</sup>Laboratory of Veterinary Pathology, College of Veterinary Medicine, Chonnam National University, Gwangju 61186, Republic of Korea; College of Veterinary Medicine and BK21 FOUR Program, Chonnam National University, Gwangju, 61186, South Korea.

<sup>4</sup>National Marine Biodiversity Institute of Korea, 75, Jangsan-ro 101beon-gil, Seoscheon-gun, Chungcheongnam-do, 33662, Republic of Korea

<sup>5</sup>Department of Chemistry and Nanoscience, Ewha Womans University, Seoul 03760, Republic of Korea

<sup>†</sup>Correspondence to: gchoi@mabik.re.kr (G. Choi); ybbaek@jnu.ac.kr (Y.-B. Baek); sipark@jnu.ac.kr (S.-I. Park)

**This PDF file includes:**

Figures S1 to S2

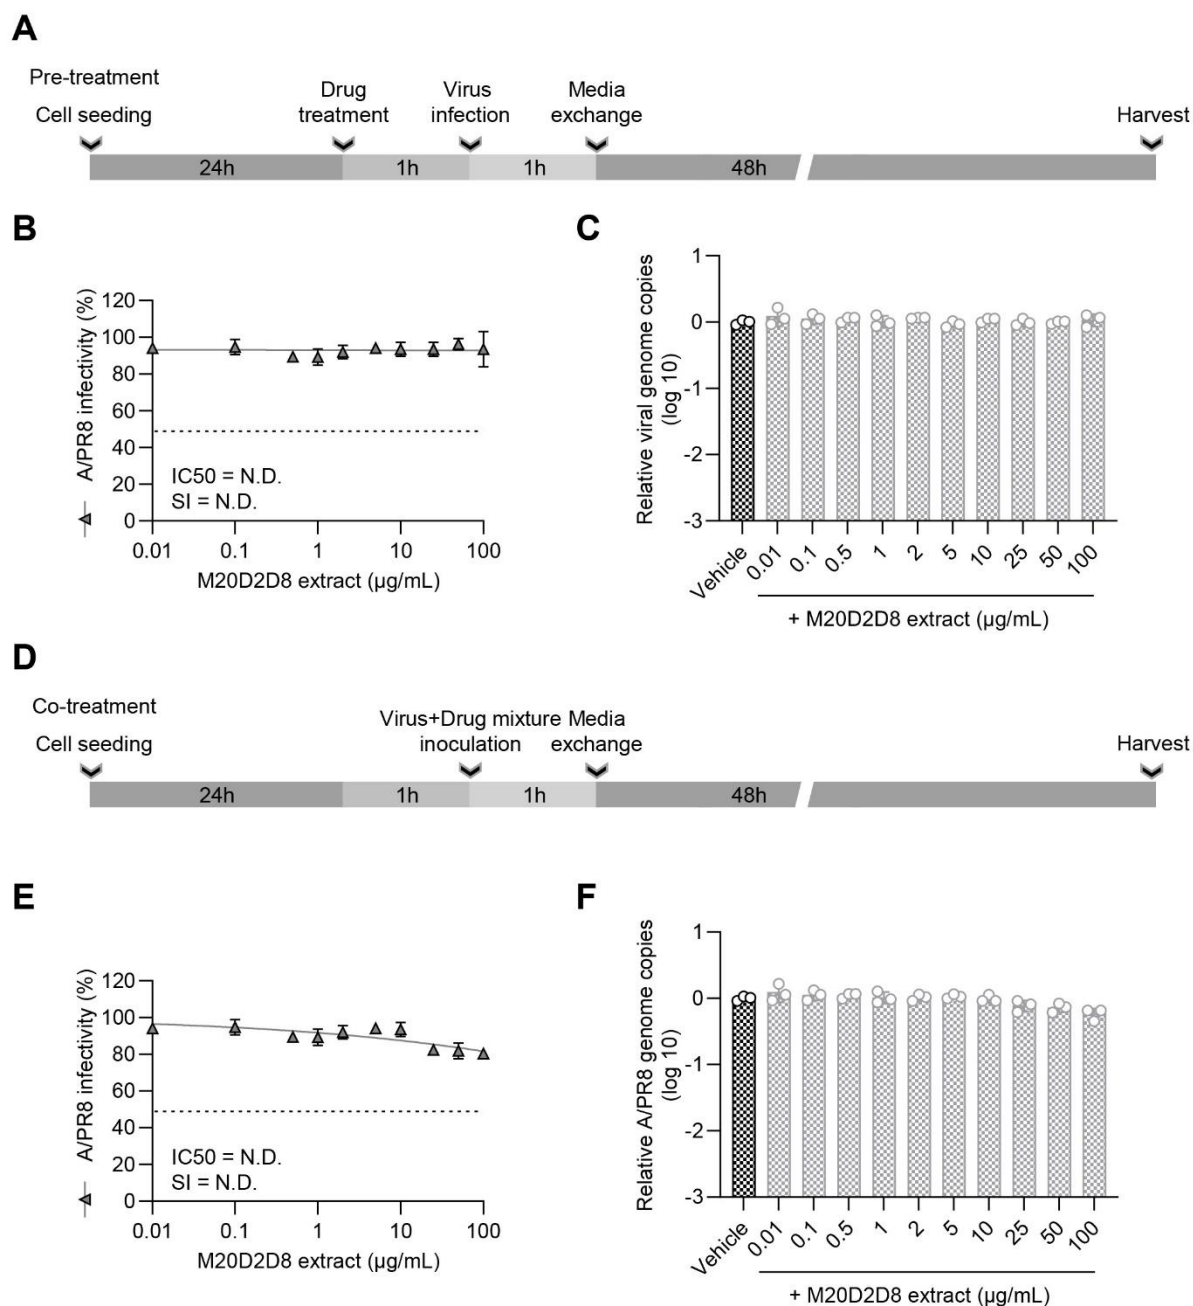

**Supplementary Fig. S1** Antiviral effect of M20D2D8 extract by pre-treatment (**A-C**) and co-treatment (**D-F**) against A/PR8 strain. (**A**) Schematic diagram of virus inoculation and extract treatment. (**B**) IC<sub>50</sub> and SI of M20D2D8 extract measured by CPE-inhibition assay. (**C**) Viral genome copies detected by RT-qPCR. (**D**) Schematic diagram of virus inoculation and extract treatment. (**E**) IC<sub>50</sub> and SI of M20D2D8 extract measured by CPE-inhibition assay. (**F**) Viral genome copies detected by RT-qPCR. All data in the graphs are presented as arithmetic means  $\pm$  S.D. from 3 independent experiments.

**A**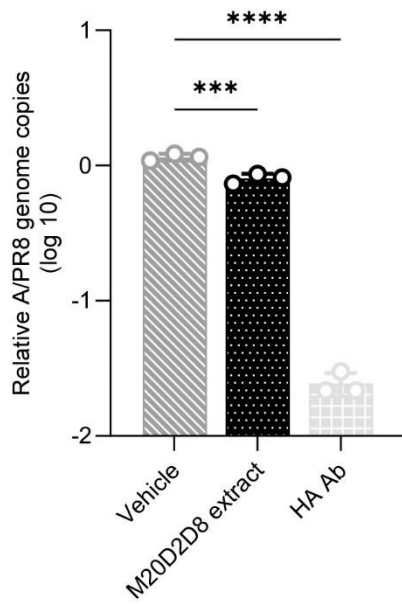**B**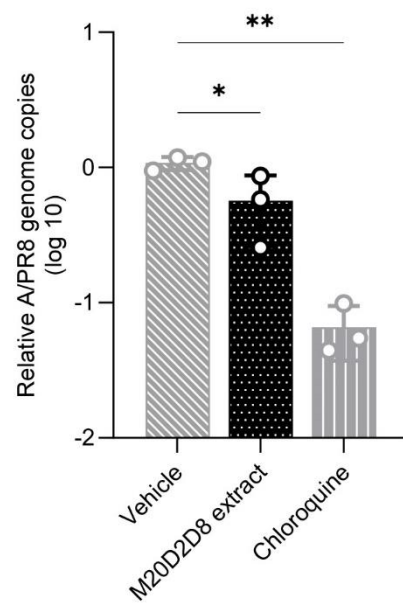

34

35 **Supplementary Fig. S2** Virus attachment (**A**) and penetration assays (**B**). (**A**) Viral genome copies by pre-  
 36 treatment of the extract before virus binding. (**B**) Viral genome copies by post-treatment after virus binding. All  
 37 data in the graphs are presented as arithmetic means  $\pm$  S.D. from 3 independent experiments. HA, haemagglutinin;  
 38 IAV NP, nucleoprotein. \*,  $P < 0.05$ ; \*\*,  $P < 0.01$ ; \*\*\*,  $P < 0.001$ , \*\*\*\*,  $P < 0.0001$ .
